# Supplementary material for: Evaluation of Raman spectroscopy combined with the gated recurrent unit serum detection method in early screening of gastrointestinal cancer
Source: Royal Society of Chemistry journal article supplement (doi:10.1039/d3an01259j), 2023-01-01
Supplement: d3an01259j4.pdf [file d3an01259j4.pdf]

# Evaluation of Raman spectroscopy combined with gate recurrent unit serum detection method in early screening of gastrointestinal cancer

Kunxiang Liu<sup>a,b</sup>, Bo Liu<sup>a,b</sup>, Yu Wang<sup>a,b</sup>, Qi Zhao<sup>c,d</sup>, Qinian Wu<sup>e\*</sup> and Bei Li<sup>a,b\*</sup>

<sup>a</sup>Changchun Institute of Optics, Fine Mechanics and Physics, Chinese Academy of Sciences, Changchun 130033, P. R. China

<sup>b</sup>University of Chinese Academy of Sciences, Beijing 100049, P. R. China

<sup>c</sup>State Key Laboratory of Oncology in South China, Collaborative Innovation Center for Cancer Medicine, Sun Yat-sen University Cancer Center, Guangzhou, Guangdong 510060, P. R. China

<sup>d</sup>Cancer Microbiome Platform, Sun Yat-sen University Cancer Center, State Key Laboratory of Oncology in South China, Collaborative Innovation Center for Cancer Medicine, Guangzhou, Guangdong 510060, P. R. China

<sup>e</sup>Department of Pathology, Sun Yat-sen University Cancer Center, Guangzhou, Guangdong 510060, P. R. China

\* Correspondence:

Bei Li ([beili@ciomp.ac.cn](mailto:beili@ciomp.ac.cn), Tel.: 0431-86708966)

and Qinian Wu ([wuqn@sysucc.org.cn](mailto:wuqn@sysucc.org.cn))

**Table. S1** Peak positions and tentative assignments of the major Raman bands from biological samples

| Peak position, cm <sup>-1</sup> | Major Assignments                                                                                                                                                                           |
|---------------------------------|---------------------------------------------------------------------------------------------------------------------------------------------------------------------------------------------|
| 855/856 <sup>1, 2</sup>         | Proline, hydroxyproline, tyrosine<br>C-C stretching, proline (collagen assignment)                                                                                                          |
| 951 <sup>3</sup>                | $\nu_s(\text{CH}_3)$ of proteins ( $\alpha$ -helix)                                                                                                                                         |
| 1000 <sup>4</sup>               | Phenylalanine<br>Bound & free NADH                                                                                                                                                          |
| 1002 <sup>1, 2</sup>            | C-C aromatic ring stretching<br>Phenylalanine                                                                                                                                               |
| 1003 <sup>5</sup>               | Phenylalanine, C-C skeletal                                                                                                                                                                 |
| 1004 <sup>1-3, 6</sup>          | Phenylalanine (of collagen)<br>$\nu_s(\text{C-C})$ , symmetric ring breathing, phenylalanine (protein assignment)<br>Phenylalanine (collagen assignment)<br>$\nu(\text{C-C})$ phenylalanine |
| 1150 <sup>7, 8</sup>            | Glycogen<br>Carotenoid                                                                                                                                                                      |
| 1152 <sup>6</sup>               | $\nu(\text{C-N})$ , proteins (protein assignment)<br>$\nu(\text{C-C})$ , carotenoid<br>Carotenoid peaks due to C-C & conjugated C=C band stretch                                            |
| 1153 <sup>7</sup>               | Carbohydrates peak for solutions                                                                                                                                                            |
| 1155 <sup>7, 9-11</sup>         | C-C (&C-N) stretching of proteins (also carotenoids)<br>Glycogen<br>$n(\text{C-C})$ Diagnostic for the presence of a carotenoid structure, most likely a cellular pigment                   |
| 1272/3                          | CH $\alpha'$ rocking                                                                                                                                                                        |
| 1275 <sup>12</sup>              | Amide III                                                                                                                                                                                   |
| 1332 <sup>13</sup>              | -C stretch of Phenyl (1) and C <sub>3</sub> -C <sub>3</sub> stretch and C <sub>5</sub> -O <sub>5</sub> stretch CH $\alpha$ in-plane bend                                                    |
| 1333 <sup>14</sup>              | Guanine                                                                                                                                                                                     |
| 1335 <sup>6, 10, 15, 16</sup>   | CH <sub>3</sub> CH <sub>2</sub> wagging, collagen (protein assignment)                                                                                                                      |

|                              |                                                                                                                                                                                                                                                                                                                                                                                     |
|------------------------------|-------------------------------------------------------------------------------------------------------------------------------------------------------------------------------------------------------------------------------------------------------------------------------------------------------------------------------------------------------------------------------------|
|                              | <p>CH<sub>3</sub>CH<sub>2</sub> wagging, nucleic acid</p> <p>CH<sub>3</sub>CH<sub>2</sub> wagging mode of collagen &amp; polynucleotide chain (DNA purine bases)</p> <p>CH<sub>3</sub>CH<sub>2</sub> twisting and wagging in collagen</p> <p>Cellular nucleic acids</p> <p>CH<sub>3</sub>CH<sub>2</sub> deforming modes of collagen and nucleic acids</p> <p>An unassigned mode</p> |
| 1436 <sup>4, 9, 17, 18</sup> | CH <sub>2</sub> scissoring                                                                                                                                                                                                                                                                                                                                                          |
| 1437 <sup>4, 9, 17, 18</sup> | <p>CH<sub>2</sub> (lipids in normal tissue)</p> <p>CH<sub>2</sub> deformation (lipid)</p> <p>Acyl chains</p>                                                                                                                                                                                                                                                                        |
| 1514 <sup>11</sup>           | $\nu(\text{C}=\text{C})$ diagnostic for the presence of a carotenoid structure, most likely a cellular pigment                                                                                                                                                                                                                                                                      |
| 1515 <sup>14</sup>           | Cytosine                                                                                                                                                                                                                                                                                                                                                                            |
| 1517 <sup>19</sup>           | b-carotene accumulation (C-C stretch mode)                                                                                                                                                                                                                                                                                                                                          |
| 1518 <sup>6</sup>            | <p><math>\nu(\text{C}=\text{C})</math>, porphyrin</p> <p>Carotenoid peaks due to C-C &amp; conjugated C=C band stretch</p>                                                                                                                                                                                                                                                          |
| 1520–38 <sup>9</sup>         | -C=C- carotenoid                                                                                                                                                                                                                                                                                                                                                                    |
| 1602 <sup>1, 6</sup>         | <p>Phenylalanine</p> <p><math>\delta(\text{C}=\text{C})</math>, phenylalanine (protein assignment)</p>                                                                                                                                                                                                                                                                              |
| 1603 <sup>9, 10, 13</sup>    | <p>C=C in-plane bending mode of phenylalanine &amp; tyrosine</p> <p>Ring C-C stretch of phenyl (1)</p>                                                                                                                                                                                                                                                                              |
| 2913–38 <sup>20</sup>        | CH stretch of lipids and proteins                                                                                                                                                                                                                                                                                                                                                   |

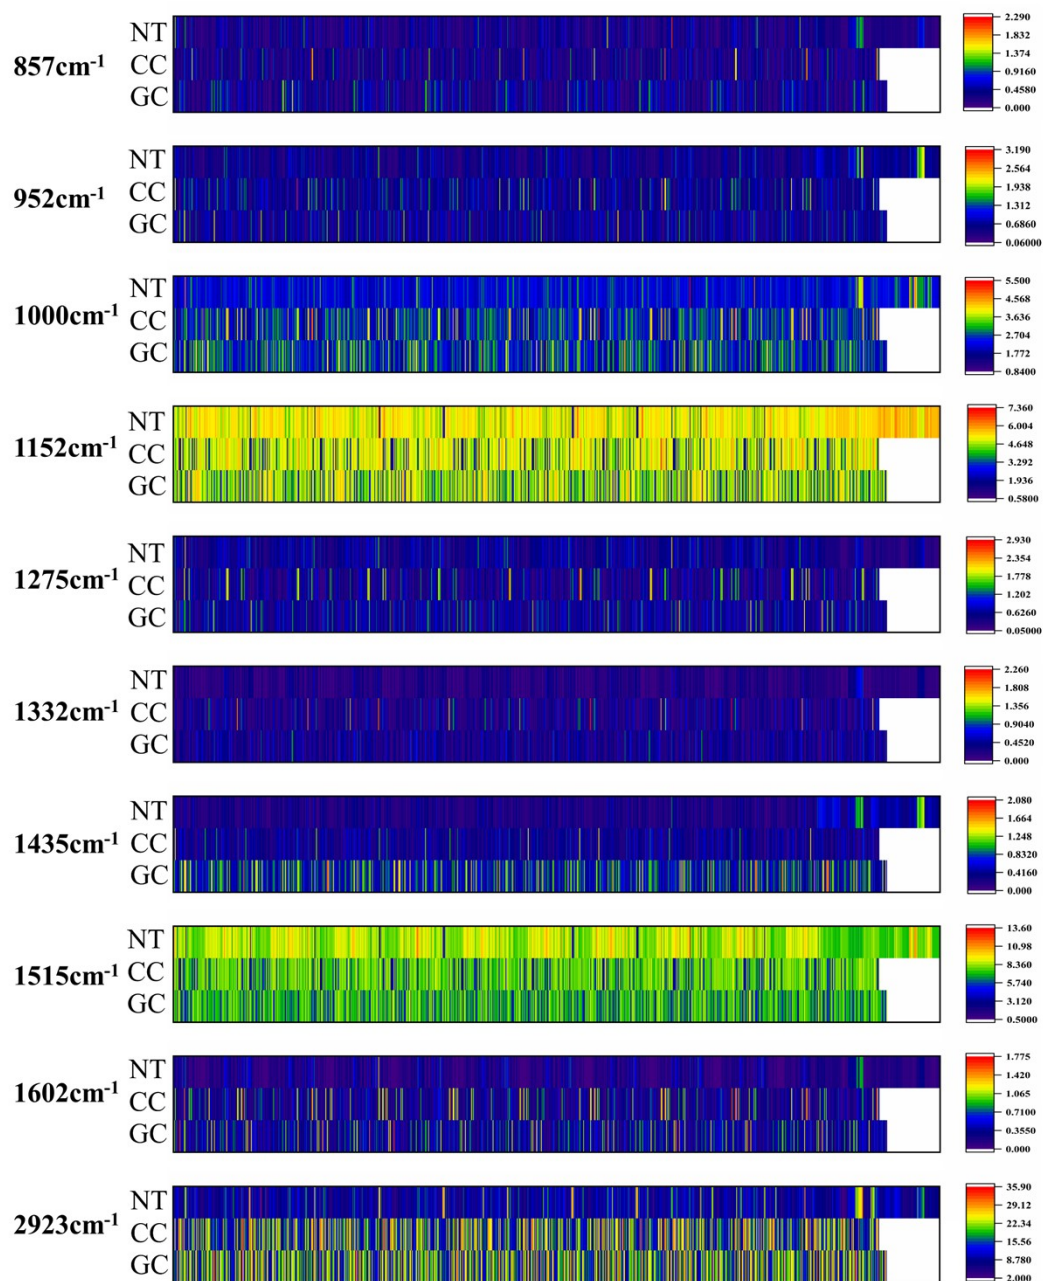

Figure S1 : Heat map of peak areas of different Raman features between patients with gastric cancer, colorectal cancer, and non-tumor. (NT: Non-tumor; CC: Colorectal cancer; GC: Gastric cancer)

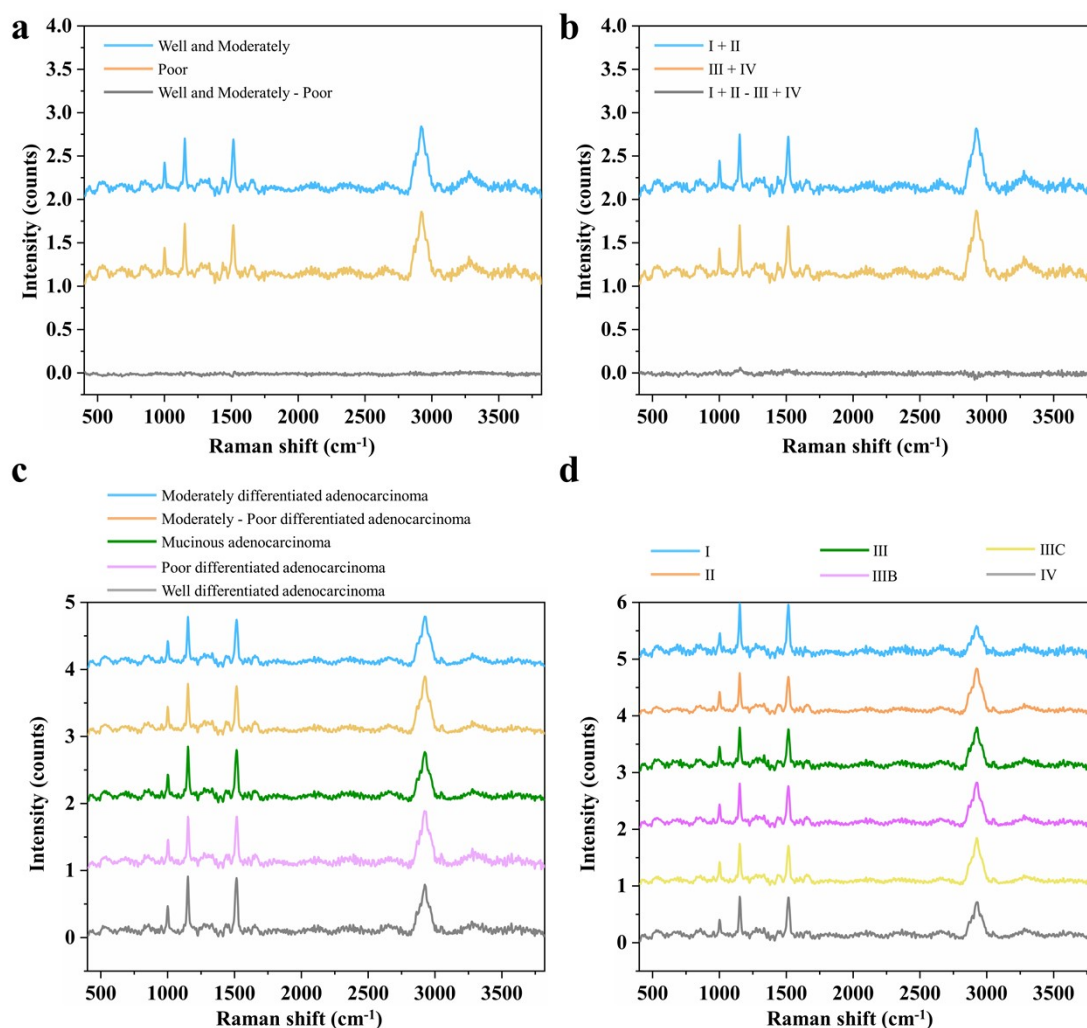

Figure S2 : Mean Raman spectra of patients with different degrees of differentiation and different stages of gastric and colorectal cancers. a). Mean Raman spectra of sera from patients with different degrees of differentiation of gastric cancer. b). Mean Raman spectra of sera from patients with different stages of gastric cancer. c). Average Raman spectra of sera from patients with different differentiation of colorectal cancer. d). Mean Raman spectra of sera from patients with different stages of colorectal cancer.

1. W. T. Cheng, M. T. Liu, H. N. Liu and S. Y. Lin, *Microsc Res Tech*, 2005, **68**, 75-79.
2. C. J. Frank, R. L. McCreery and D. C. Redd, *Anal Chem*, 1995, **67**, 777-783.
3. R. J. Lakshmi, V. B. Kartha, C. M. Krishna, J. G. R. Solomon and G. U. U. Devi, *Radiation Research*, 2002, **157**, 175-182.
4. R. Malini, K. Venkatakrishna, J. Kurien, K. M. Pai, L. Rao, V. B. Kartha and C. M. Krishna, *Biopolymers*, 2006, **81**, 179-193.
5. J. W. Chan, D. S. Taylor, T. Zwerdling, S. M. Lane, K. Ihara and T. Huser, *Biophysical Journal*, 2006, **90**, 648-656.
6. Z. Huang, A. McWilliams, S. Lam, H. Lui and H. Zeng, *Lung Cancer*, 2003, **41**.
7. R. K. Dukor, *Biomedical Applications*, 2006, DOI: 10.1002/0470027320.s8107.

8. E. B. Hanlon, R. Manoharan, T. W. Koo, K. E. Shafer, J. T. Motz, M. Fitzmaurice, J. R. Kramer, I. Itzkan, R. R. Dasari and M. S. Feld, *Phys Med Biol*, 2000, **45**, R1-59.
9. N. Stone, C. Kendall, J. Smith, P. Crow and H. Barr, *Faraday Discuss*, 2004, **126**, 141-157; discussion 169-183.
10. N. Stone, C. Kendall, N. Shepherd, P. Crow and H. Barr, *Journal of Raman Spectroscopy*, 2002, **33**, 564-573.
11. D. Naumann, 1998.
12. G. Shetty, C. Kendall, N. Shepherd, N. Stone and H. Barr, *Br J Cancer*, 2006, **94**, 1460-1464.
13. H. Schulz and M. Baranska, *Vibrational Spectroscopy*, 2007, **43**, 13-25.
14. A. J. Ruiz-Chica, M. A. Medina, F. Sánchez-Jiménez and F. J. Ramírez, *Journal of Raman Spectroscopy*, 2004, **35**, 93-100.
15. Z. Huang, A. McWilliams, S. Lam, J. English, D. I. McLean, H. Lui and H. Zeng, *Int J Oncol*, 2003, **23**, 649-655.
16. S. Farquharson, C. Shende, F. E. Inscore, P. Maksymiuk and A. Gift, *Journal of Raman Spectroscopy*, 2005, **36**, 208-212.
17. E. Ó Faoláin, M. B. Hunter, J. M. Byrne, P. Kelehan, M. McNamara, H. J. Byrne and F. M. Lyng, *Vibrational Spectroscopy*, 2005, **38**, 121-127.
18. C. Krafft, L. Neudert, T. Simat and R. Salzer, *Spectrochim Acta A Mol Biomol Spectrosc*, 2005, **61**, 1529-1535.
19. L. Silveira, Jr., S. Sathaiah, R. A. Zangaro, M. T. Pacheco, M. C. Chavantes and C. A. Pasqualucci, *Lasers Surg Med*, 2002, **30**, 290-297.
20. S. Koljenovic, T. B. Schut, A. Vincent, J. M. Kros and G. J. Puppels, *Anal Chem*, 2005, **77**, 7958-7965.
