# Supplementary figures and images for: Evaluation of Raman spectroscopy combined with the gated recurrent unit serum detection method in early screening of gastrointestinal cancer
Source: Royal Society of Chemistry journal article supplement (doi:10.1039/d3an01259j), 2023-01-01

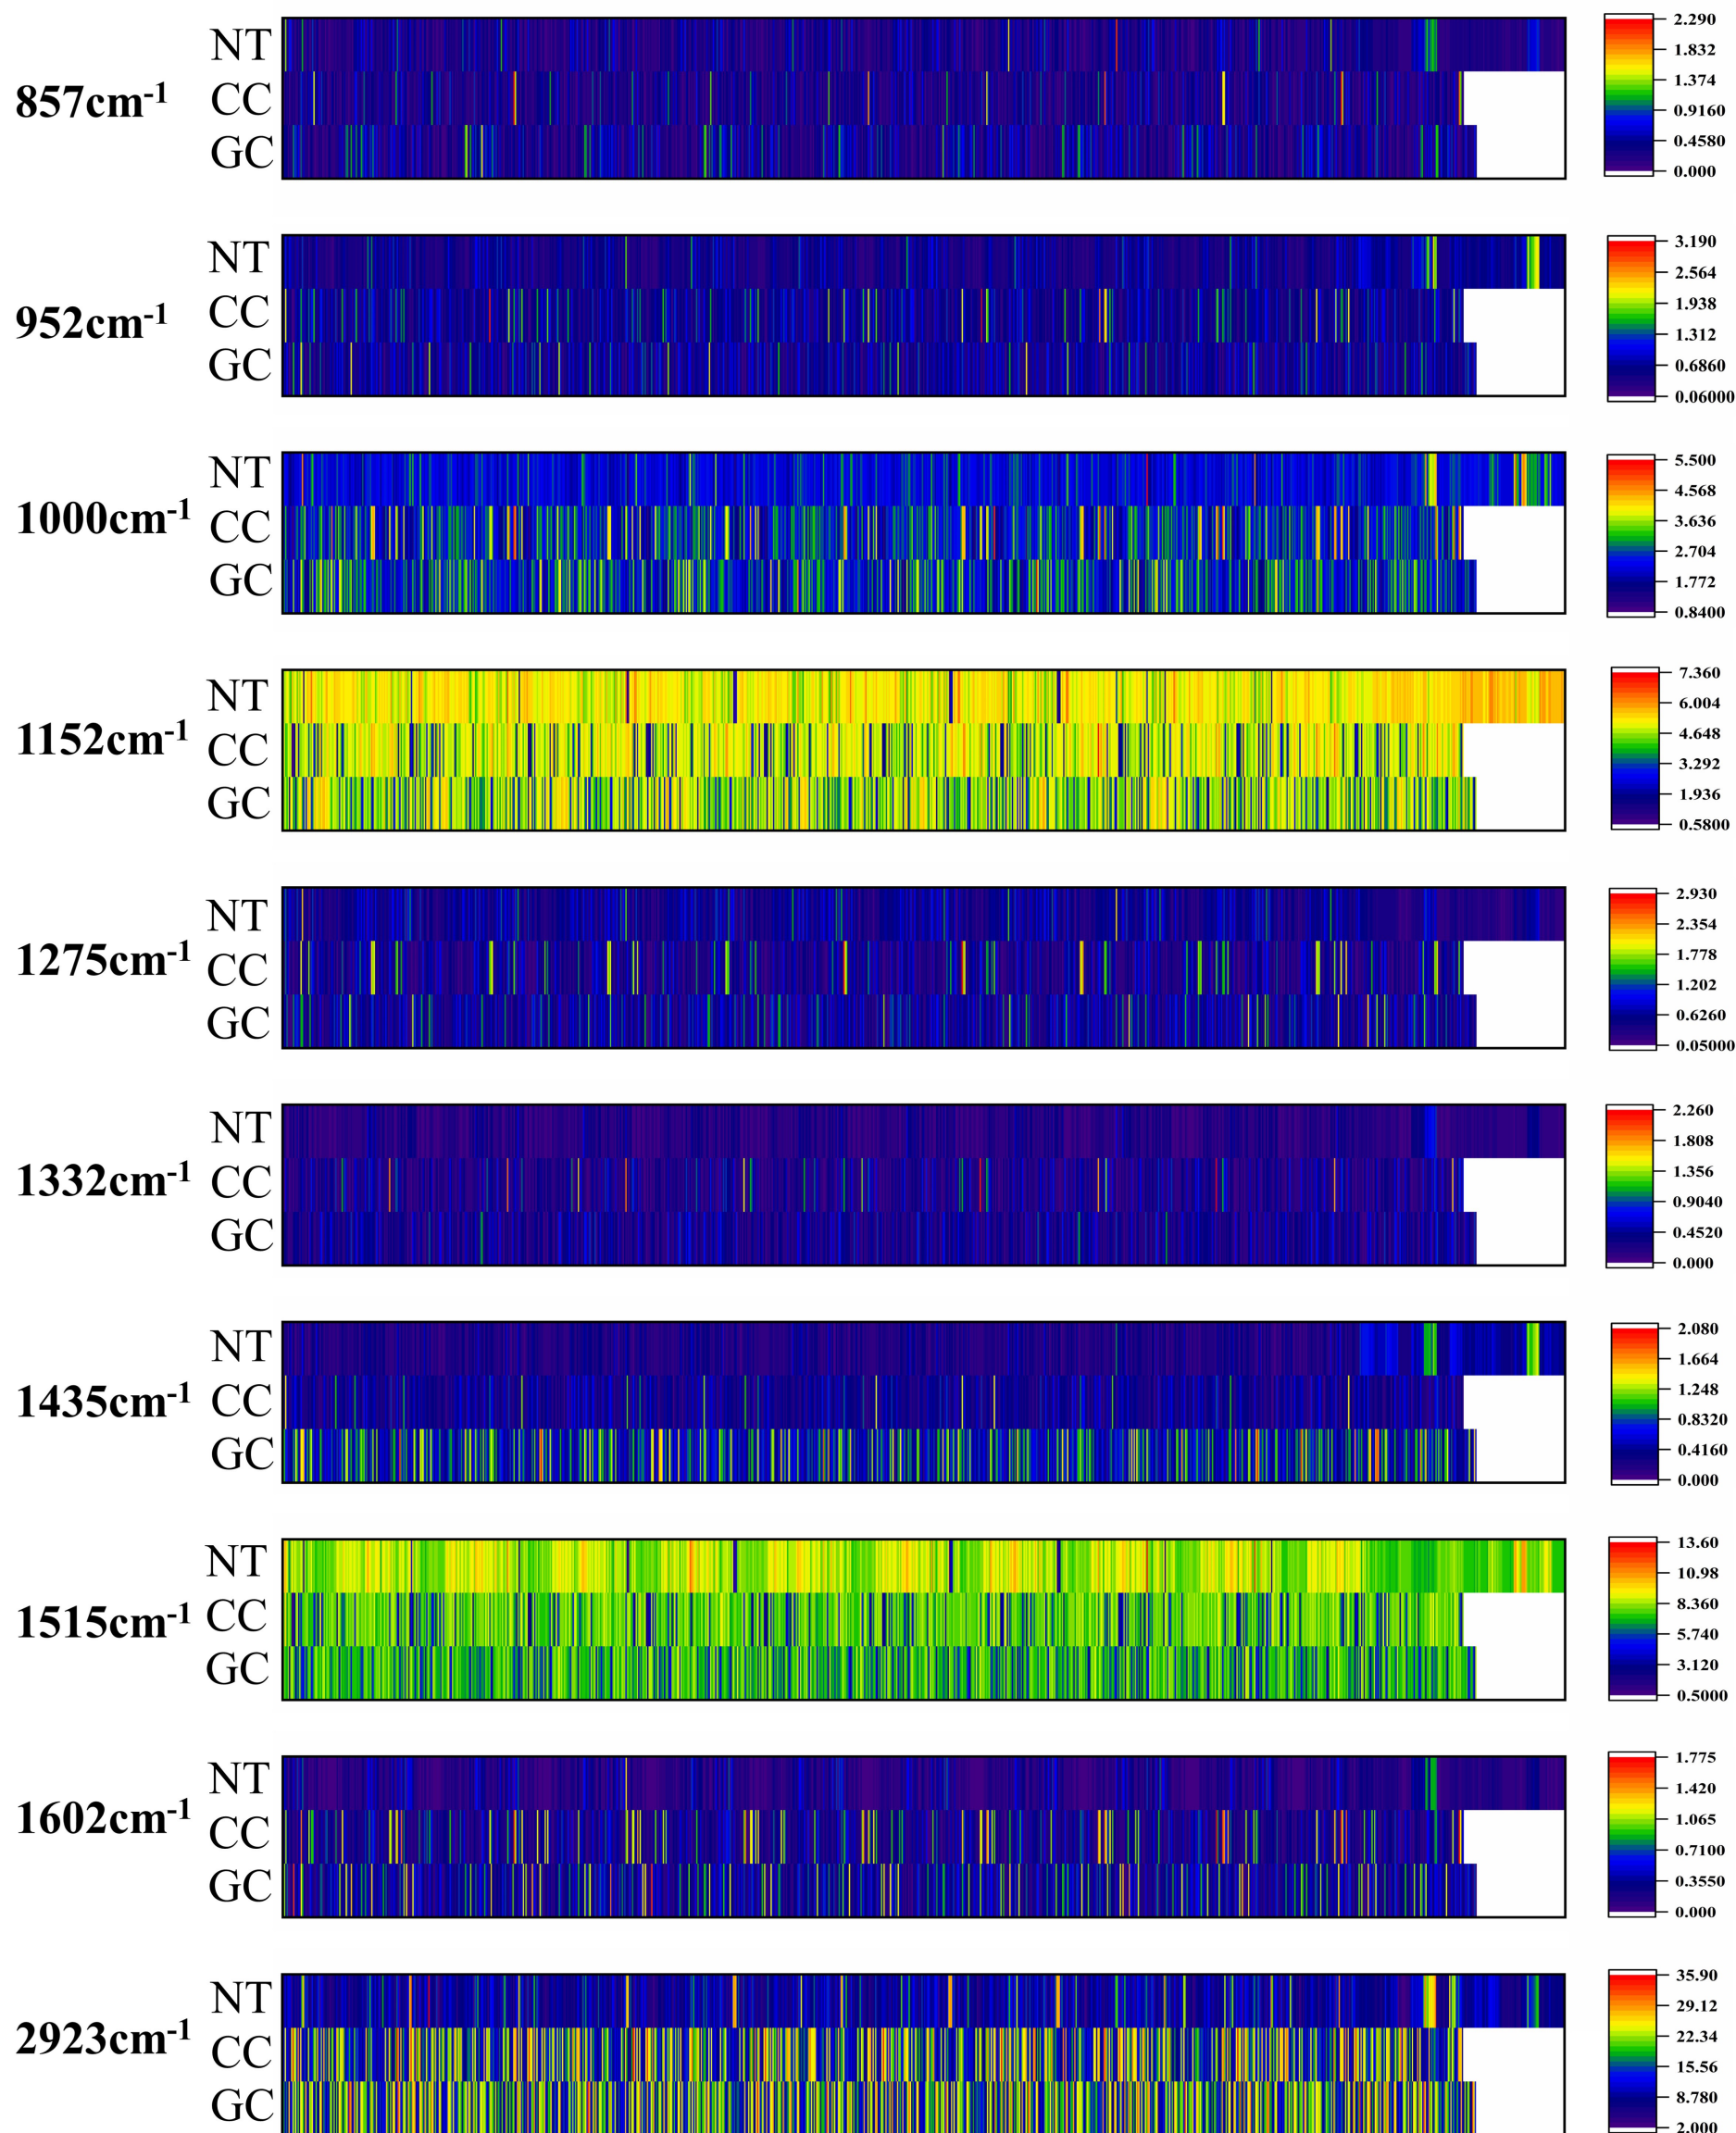

Supplement: d3an01259j2.pdf [file d3an01259j2.pdf]

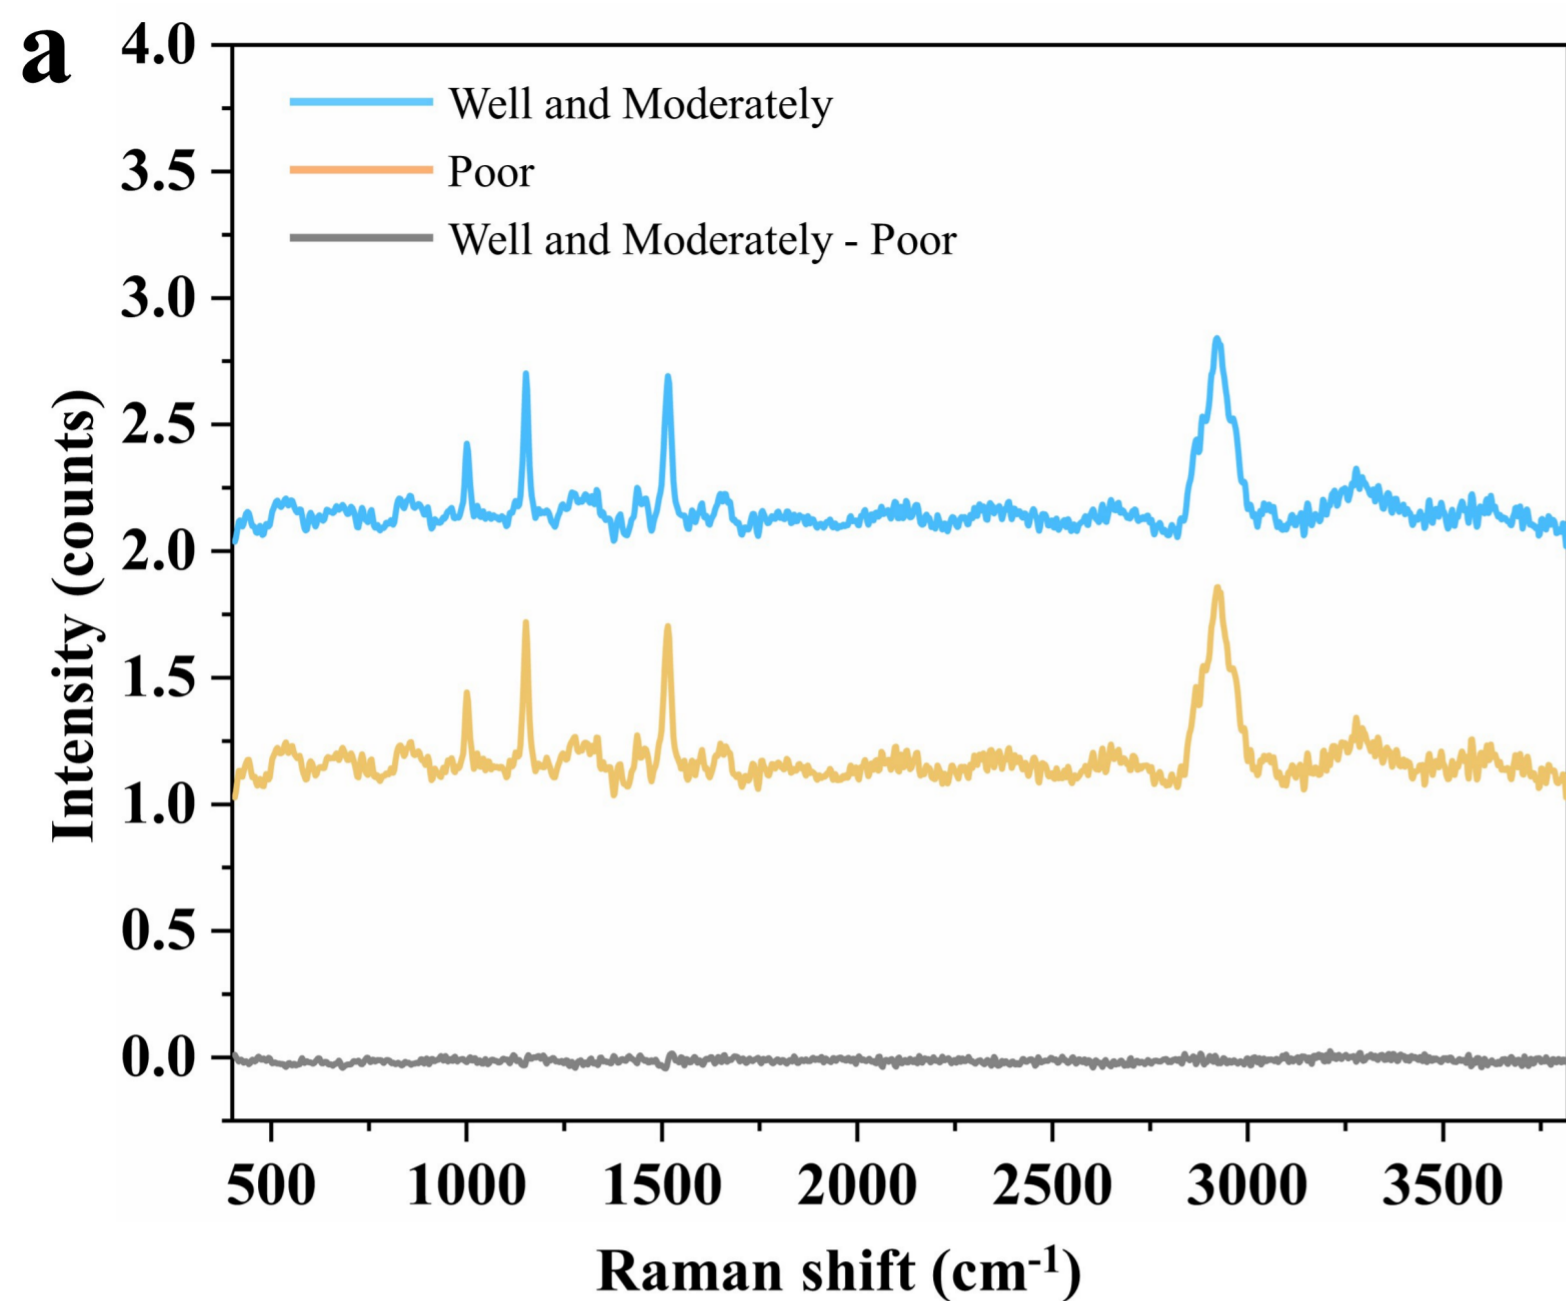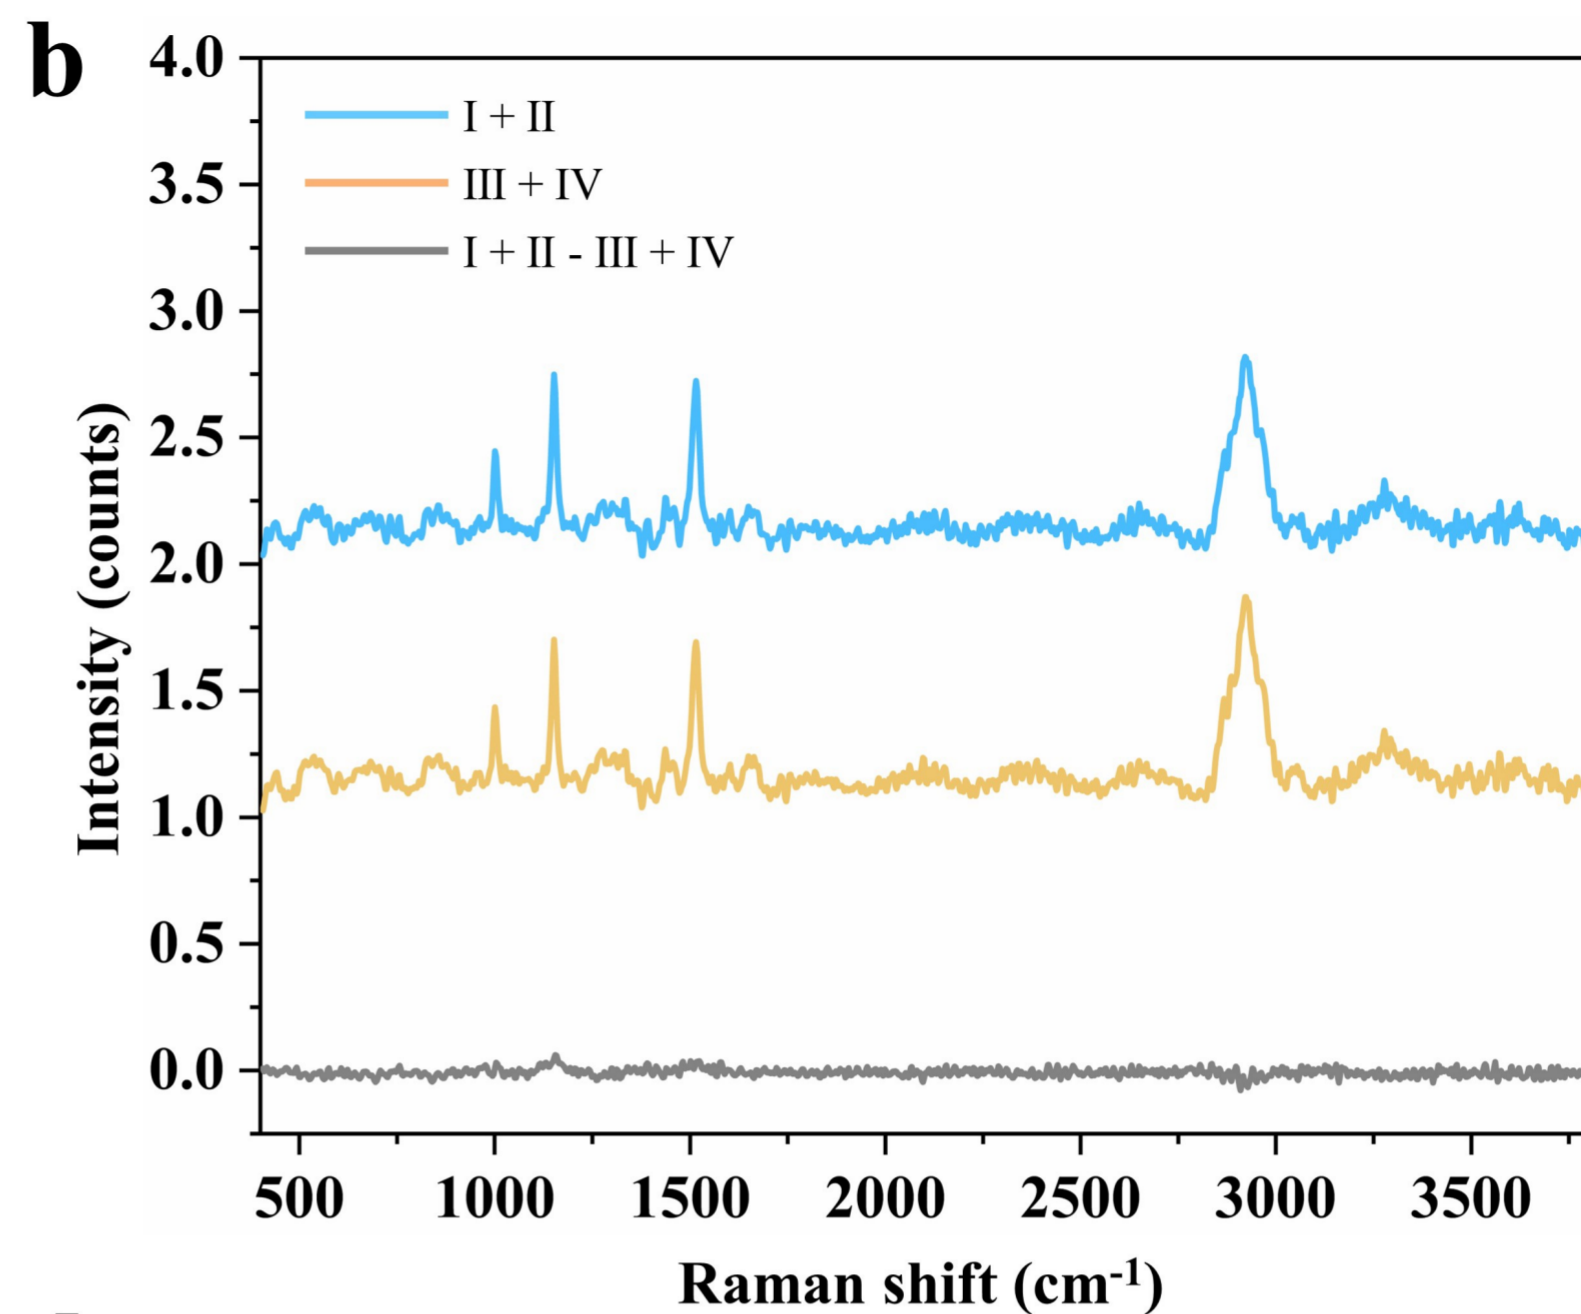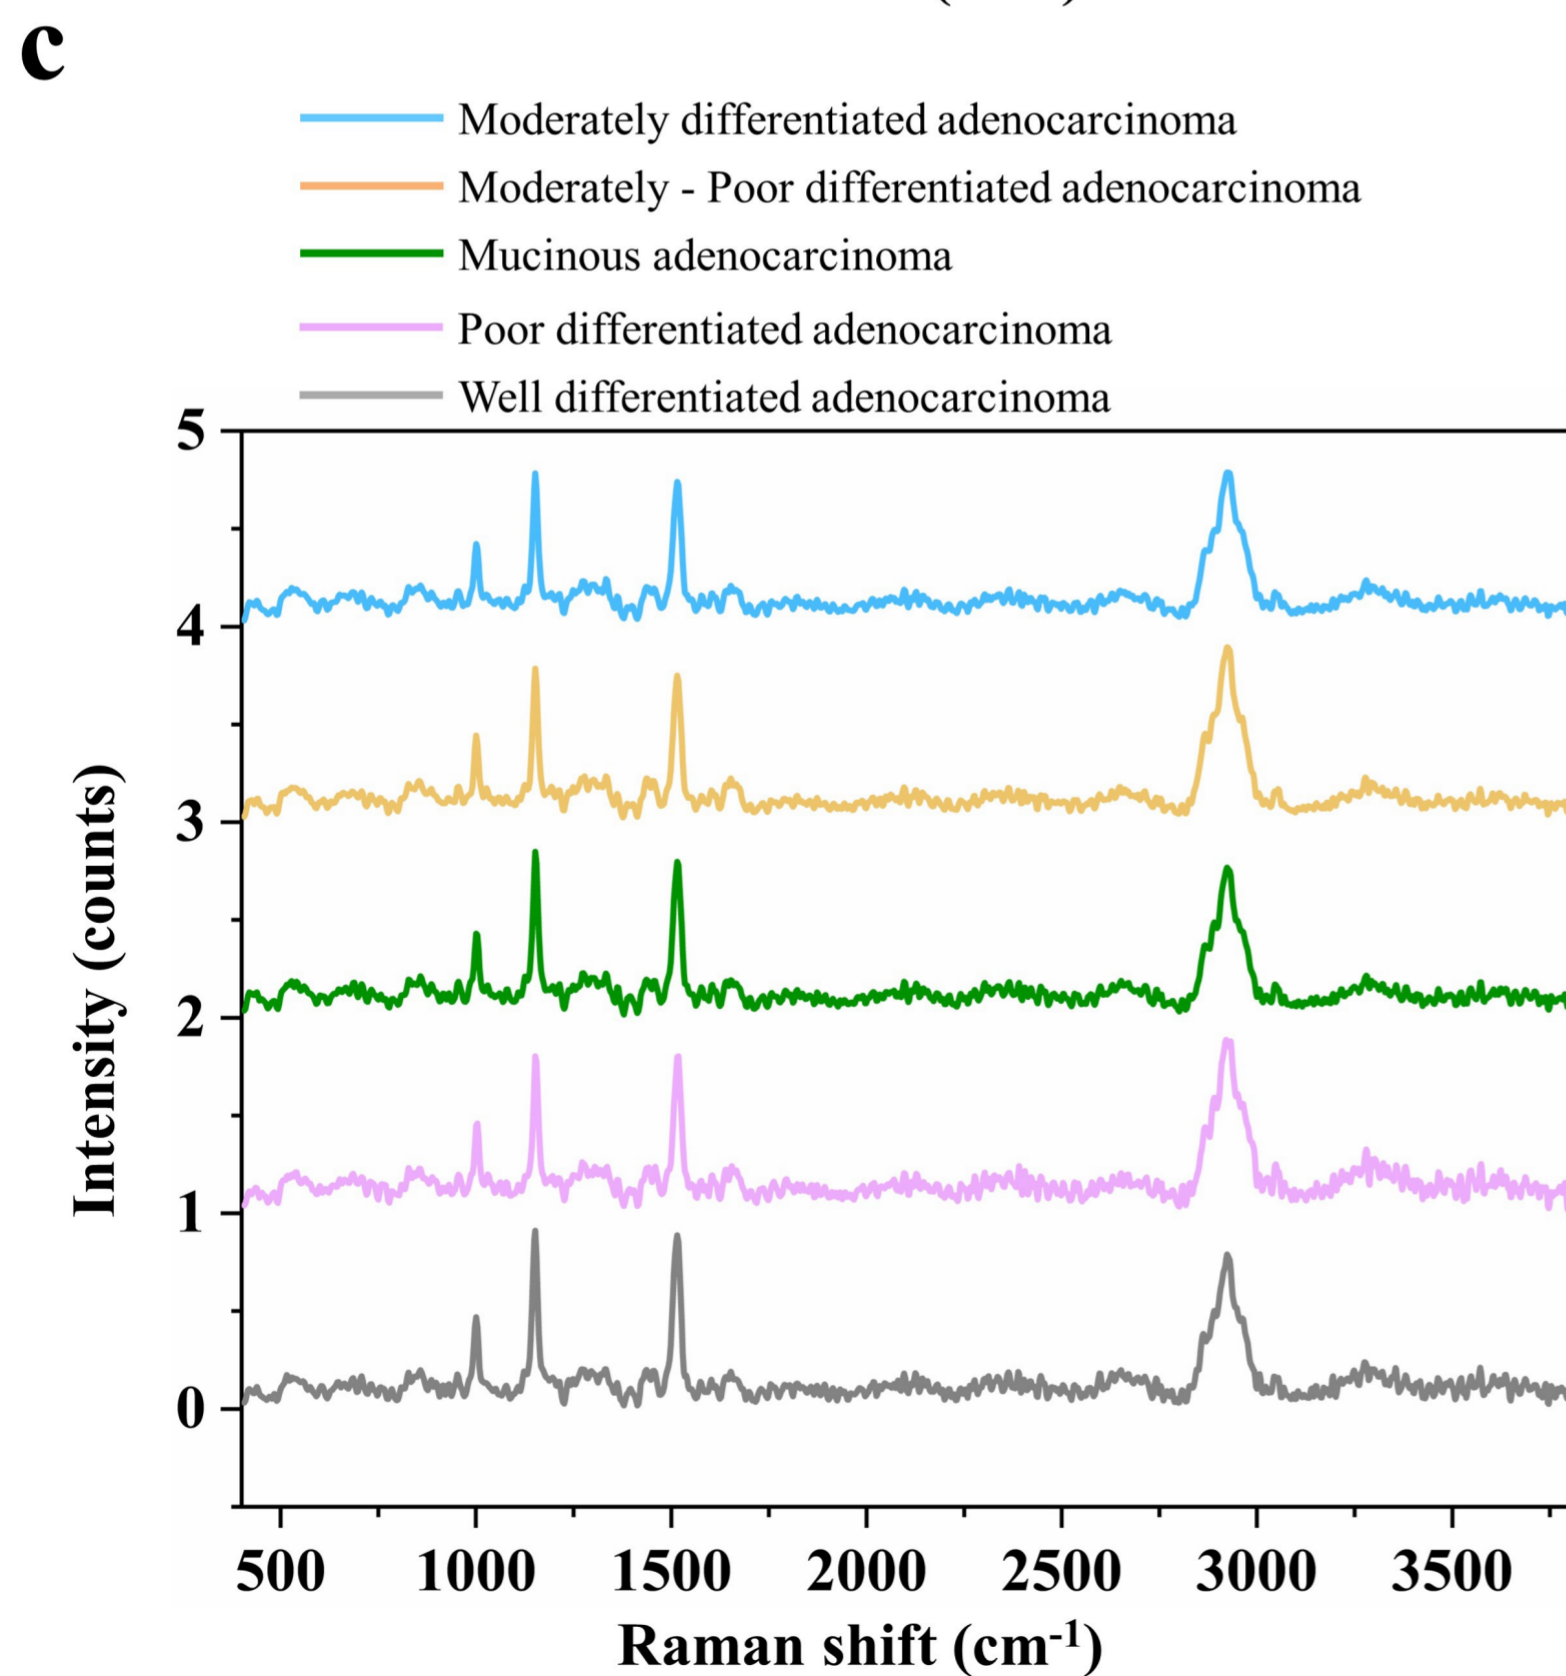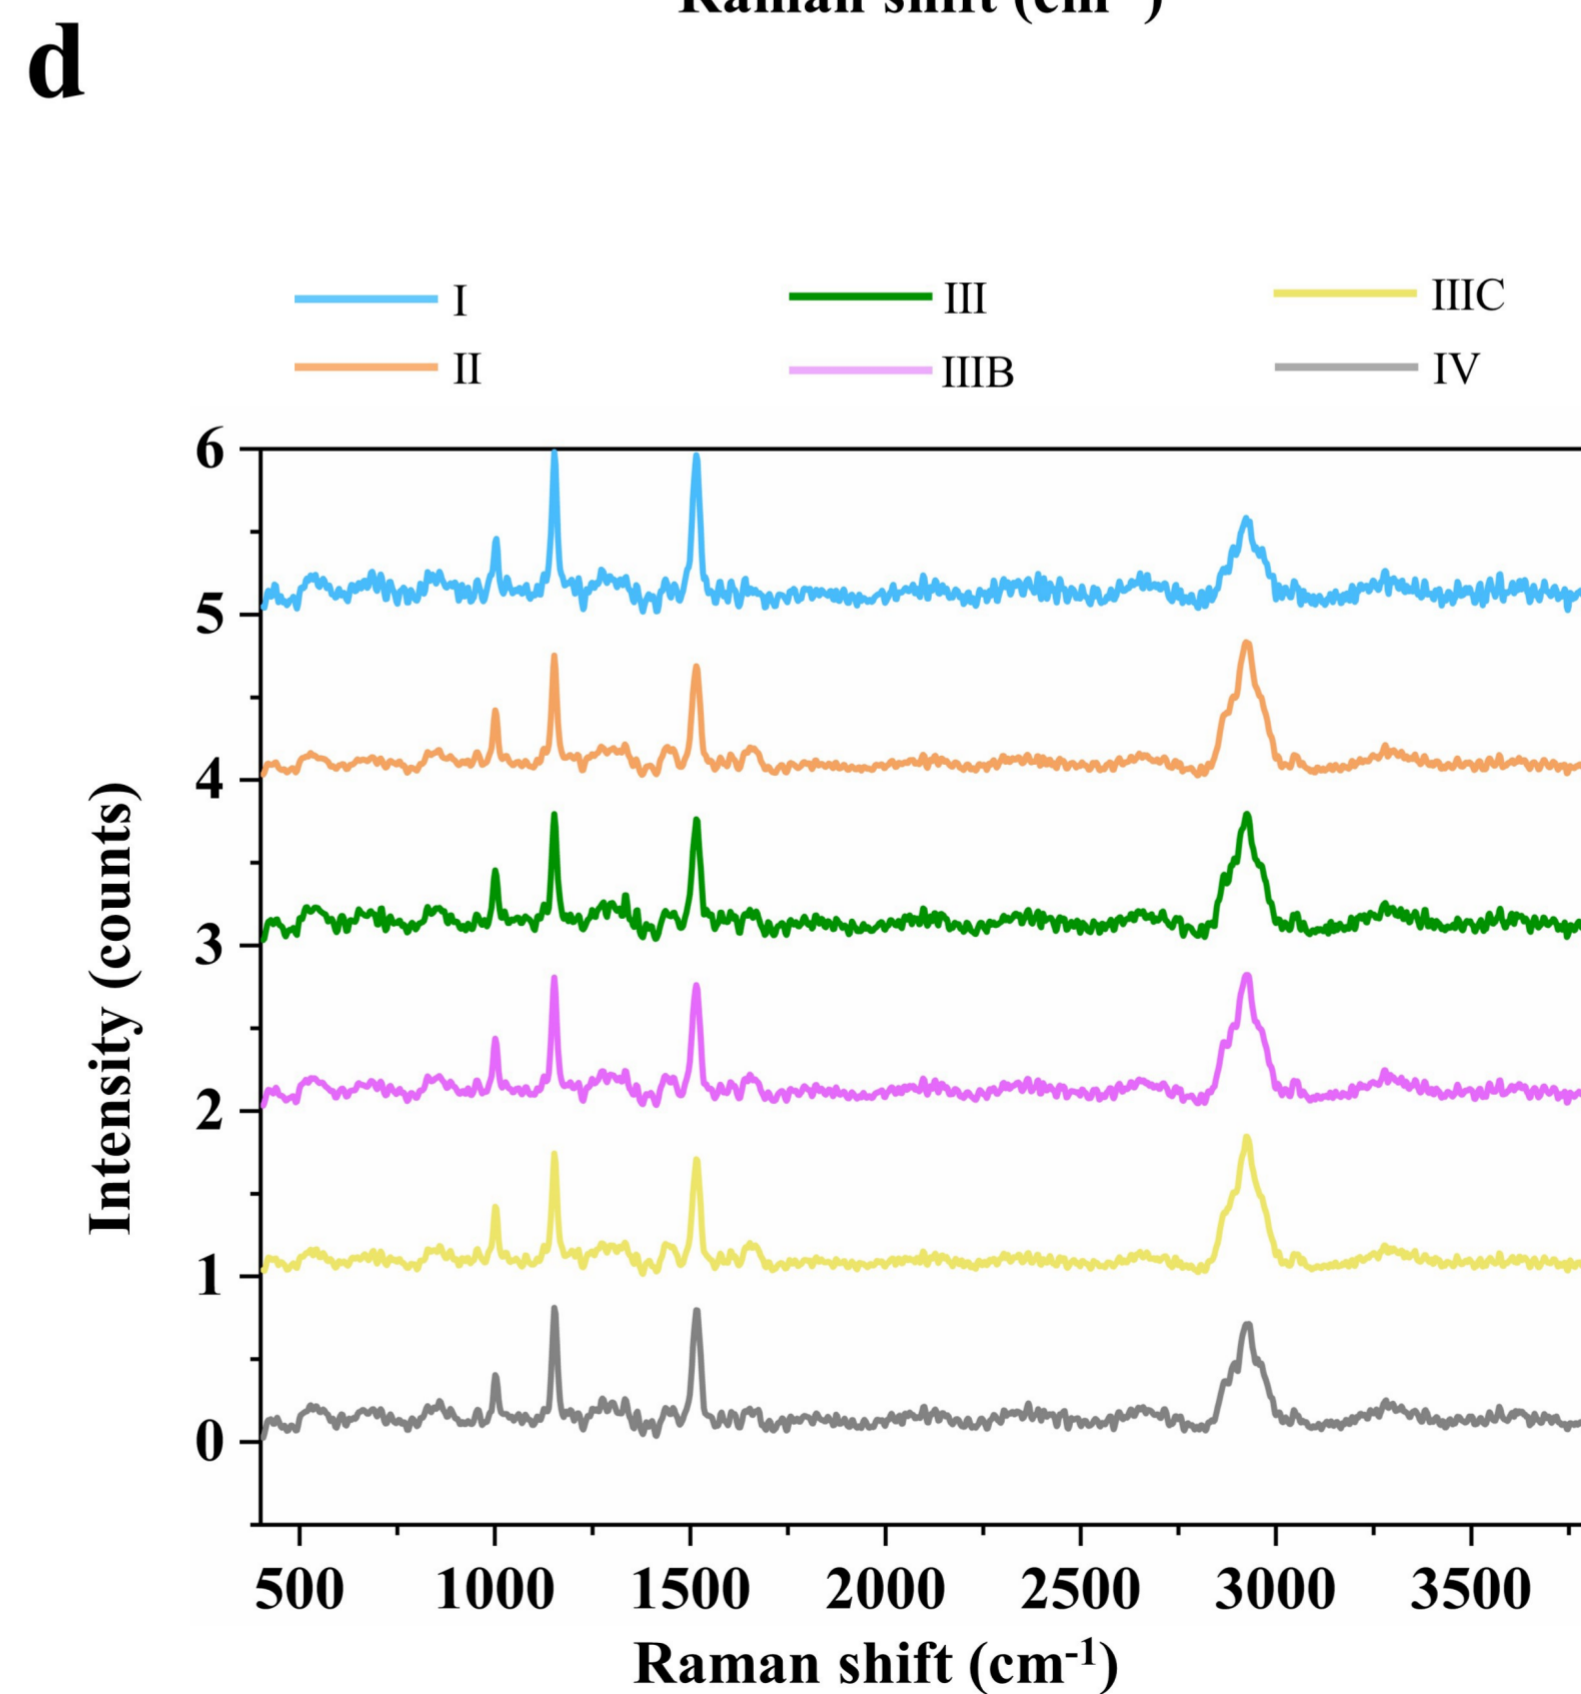

Supplement: d3an01259j3.pdf [file d3an01259j3.pdf]
